# Supplementary material for: Genetic diversity of currently circulating rubella viruses: a need to define more precise viral groups
Source: PubMed Central journal article supplement (PMC5797949; doi:10.1099/jgv.0.000680), 2017-04-01
Supplement: jgv-98-396-s001.pdf [file jgv-98-396-s001.pdf]

## Legend of the Supplementary Figures

### Supplementary Figure 1:

Geographic distribution of rubella virus genotypes based on collection countries and likely-source countries between 2010 and 2014. The top panels show the distribution for the period 2010-2014 period. The panels below show the distribution year per year. The number of sequences analyzed by country as well as the genotype is color coded according to the legends shown at the bottom of the figure. Pie charts show the genotype distribution for each country.

### Supplementary Figure 2

Phylogenetic tree of rubella viruses of 1J genotype: a neighbor joining tree was generated with Mega 6 using the maximum composite likelihood nucleotide substitution model (Kumar *et al.*, 2004; Saitou & Nei, 1987; Tamura *et al.*, 2011). The phylogenetic inference was tested with the bootstrap method with 1000 replications. Bootstraps values greater than 70% are shown. Sequences of viruses collected after 2010 are identified with a black circle. The tree was rooted with RVi/Pennsylvania.USA/64VACC\_JF727653.2.

### Supplementary Figure 3:

Analysis workflow of genotype 1G. The analysis process leading up to the designation of primary, secondary and tertiary lineages within the 1G genotype is described. Reasons for splitting a genetic group are boxed and resulting groups are circled. All the relevant information is summarized in Table 2. \* The tertiary lineages 1G-L2b1, 2 and 3 collected Uganda were previously described by Namuwulya *et al.* (Namuwulya *et al.*, 2014)

### Supplementary Figure 4

Phylogenetic tree of rubella viruses of 1E genotype, as indicated in Supplementary Figure 2.

### Supplementary Figure 5

Phylogenetic tree of rubella viruses of 2B genotype: as indicated in Supplementary Figure 2.

Supplementary Table 1: List of known imported cases

| Collection Country                                                    | Source Country               | Year | Genotype | CRS * |
|-----------------------------------------------------------------------|------------------------------|------|----------|-------|
| Taiwan                                                                | China                        | 2010 | 1E       |       |
| Taiwan                                                                | China                        | 2010 | 1E       |       |
| Taiwan                                                                | China                        | 2010 | 1E       |       |
| Taiwan                                                                | China                        | 2010 | 1E       |       |
| Taiwan                                                                | China                        | 2010 | 1E       |       |
| United States                                                         | India                        | 2010 | 2B       |       |
| United States                                                         | Kenya                        | 2010 | 1G       |       |
| Hong Kong                                                             | Philippines                  | 2010 | 1J       |       |
| Russia                                                                | China                        | 2011 | 1E       |       |
| Taiwan                                                                | China                        | 2011 | 1E       |       |
| Taiwan                                                                | China                        | 2011 | 1E       |       |
| Taiwan                                                                | China                        | 2011 | 1E       |       |
| Taiwan                                                                | China                        | 2011 | 1E       |       |
| Taiwan                                                                | China                        | 2011 | 1E       |       |
| Taiwan                                                                | China                        | 2011 | 1E       |       |
| Chile                                                                 | India                        | 2011 | 2B       |       |
| United States                                                         | India                        | 2011 | 2B       |       |
| United States                                                         | Indonesia                    | 2011 | 1E       |       |
| Hong Kong                                                             | Indonesia                    | 2011 | 2B       |       |
| Japan                                                                 | Philippines                  | 2011 | 1J       |       |
| Canada                                                                | Philippines                  | 2011 | 2B       |       |
| United States                                                         | South Africa                 | 2011 | 2B       |       |
| Taiwan                                                                | Vietnam                      | 2011 | 1E       |       |
| United States                                                         | India                        | 2012 | 2B       |       |
| United States                                                         | Indonesia                    | 2012 | 1E       |       |
| United States                                                         | Nigeria                      | 2012 | 1G       | yes   |
| United Kingdom                                                        | Romania                      | 2012 | 2B       |       |
| United States                                                         | Sudan                        | 2012 | 1E       | yes   |
| United States                                                         | Tanzania, United Republic of | 2012 | 1G       | yes   |
| United States                                                         | Algeria                      | 2013 | 2B       |       |
| Canada                                                                | Japan                        | 2013 | 2B       |       |
| United States                                                         | Japan                        | 2013 | 2B       |       |
| United States                                                         | Pakistan                     | 2013 | 2B       |       |
| United States                                                         | Yemen                        | 2013 | 1E       | yes   |
| United States                                                         | Afghanistan                  | 2014 | 2B       |       |
| United States                                                         | China                        | 2014 | 2B       |       |
| United States                                                         | India                        | 2014 | 2B       |       |
| United States                                                         | Indonesia                    | 2014 | 1E       |       |
| Canada                                                                | Philippines                  | 2014 | 1J       |       |
| *: sequence obtained from a case of congenital rubella syndrome (CRS) |                              |      |          |       |

### Collection country

### Likely source country

2010  
2014  
  
2010  
  
2011  
  
2012  
  
2013  
  
2014

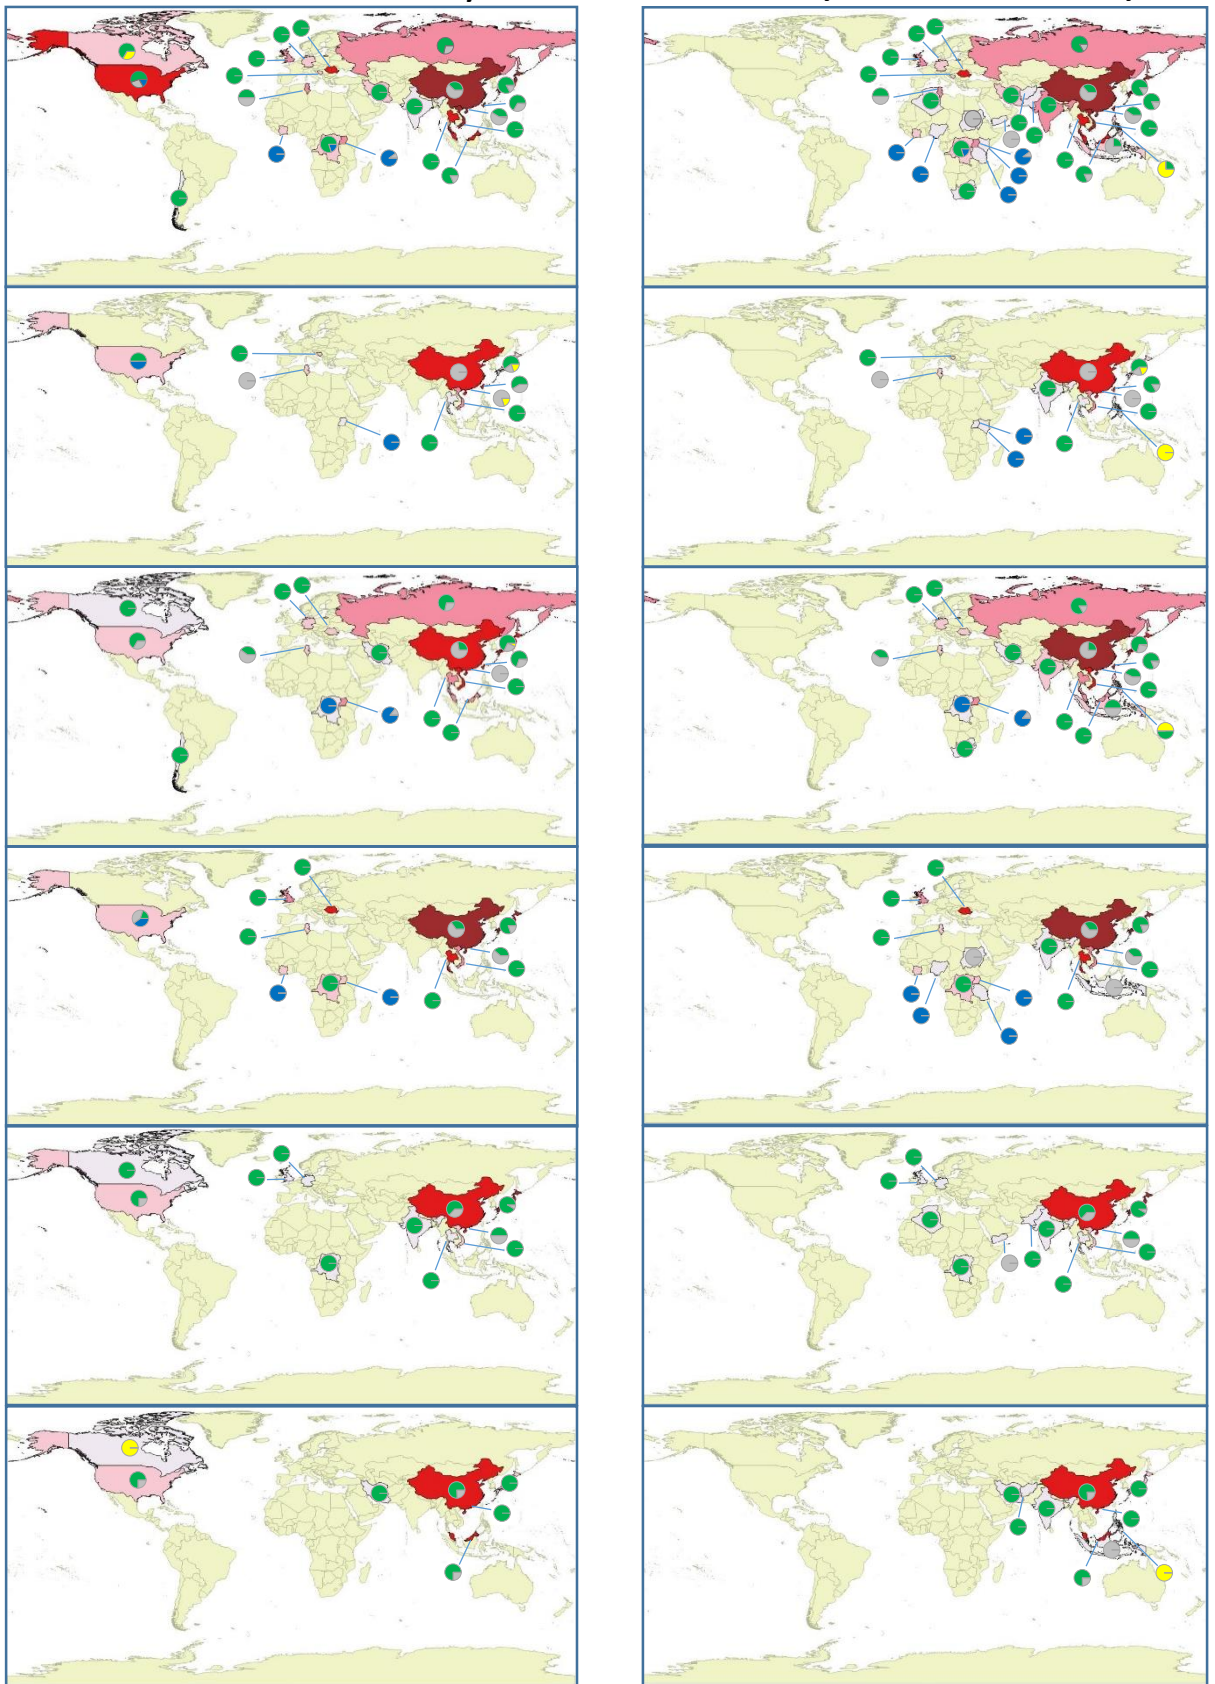

Number of viruses     1     2-5     6-10     11-50     50+

Genotype     1J     1G     1E     2B

Supplementary Figure 1

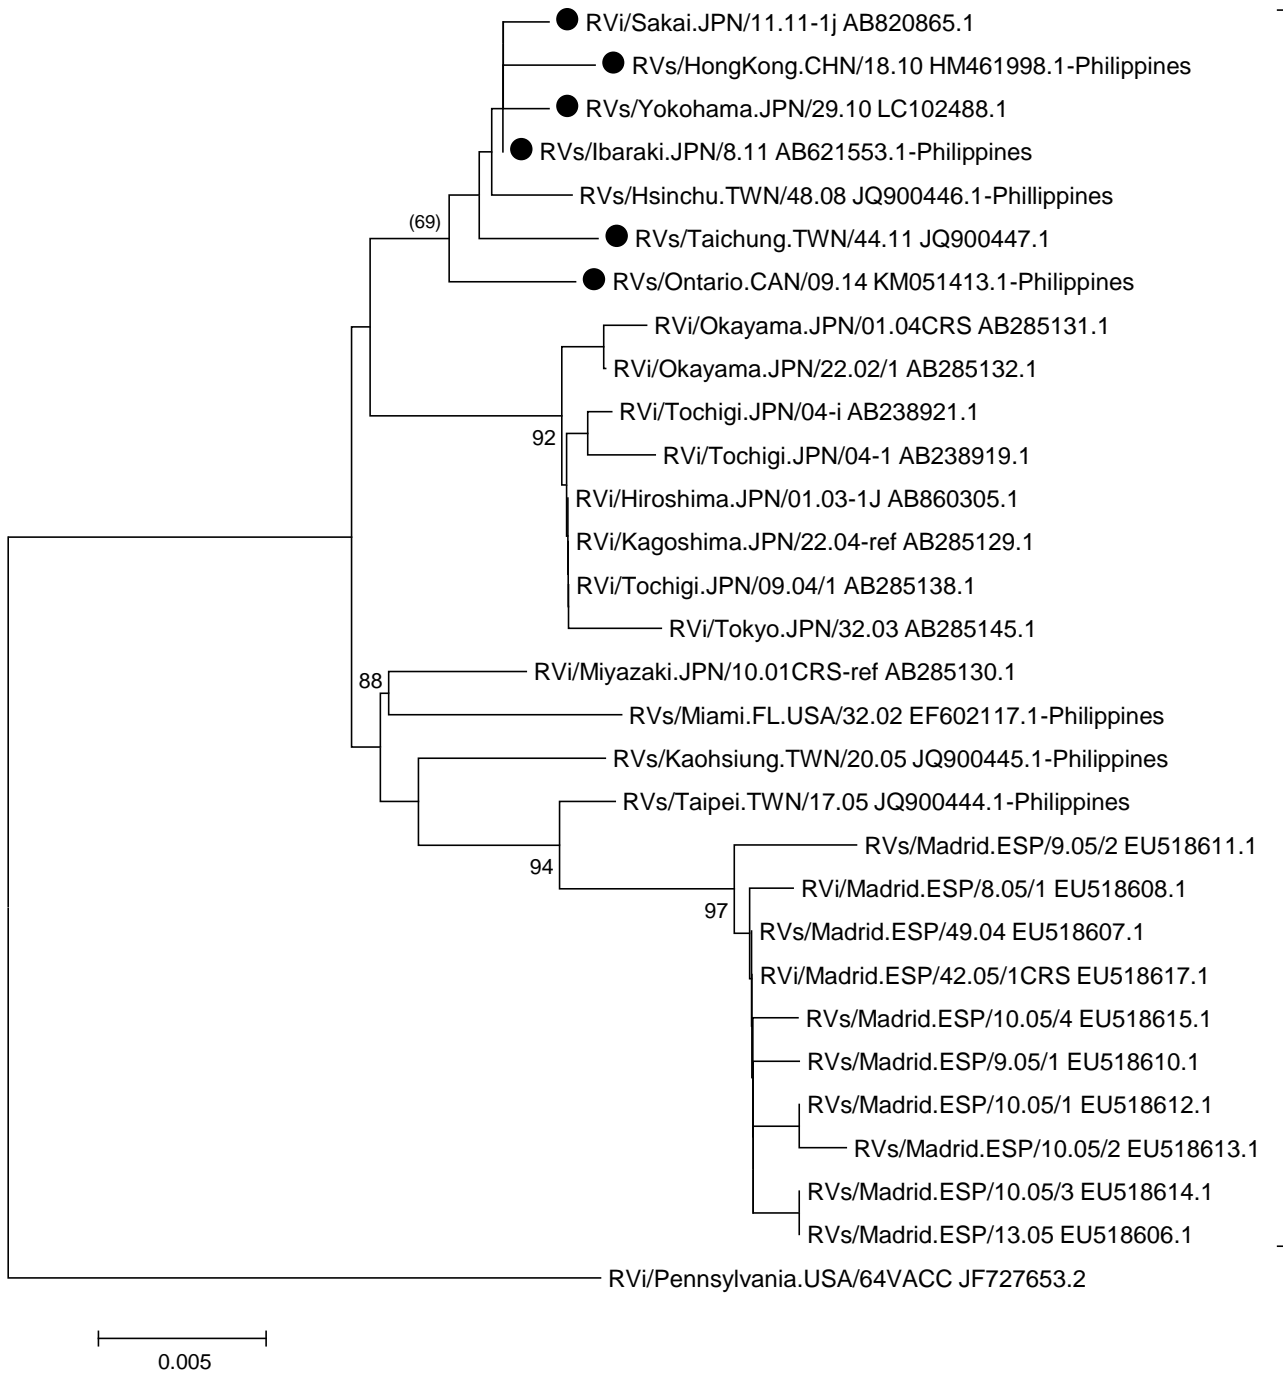

Supplementary Figure 2

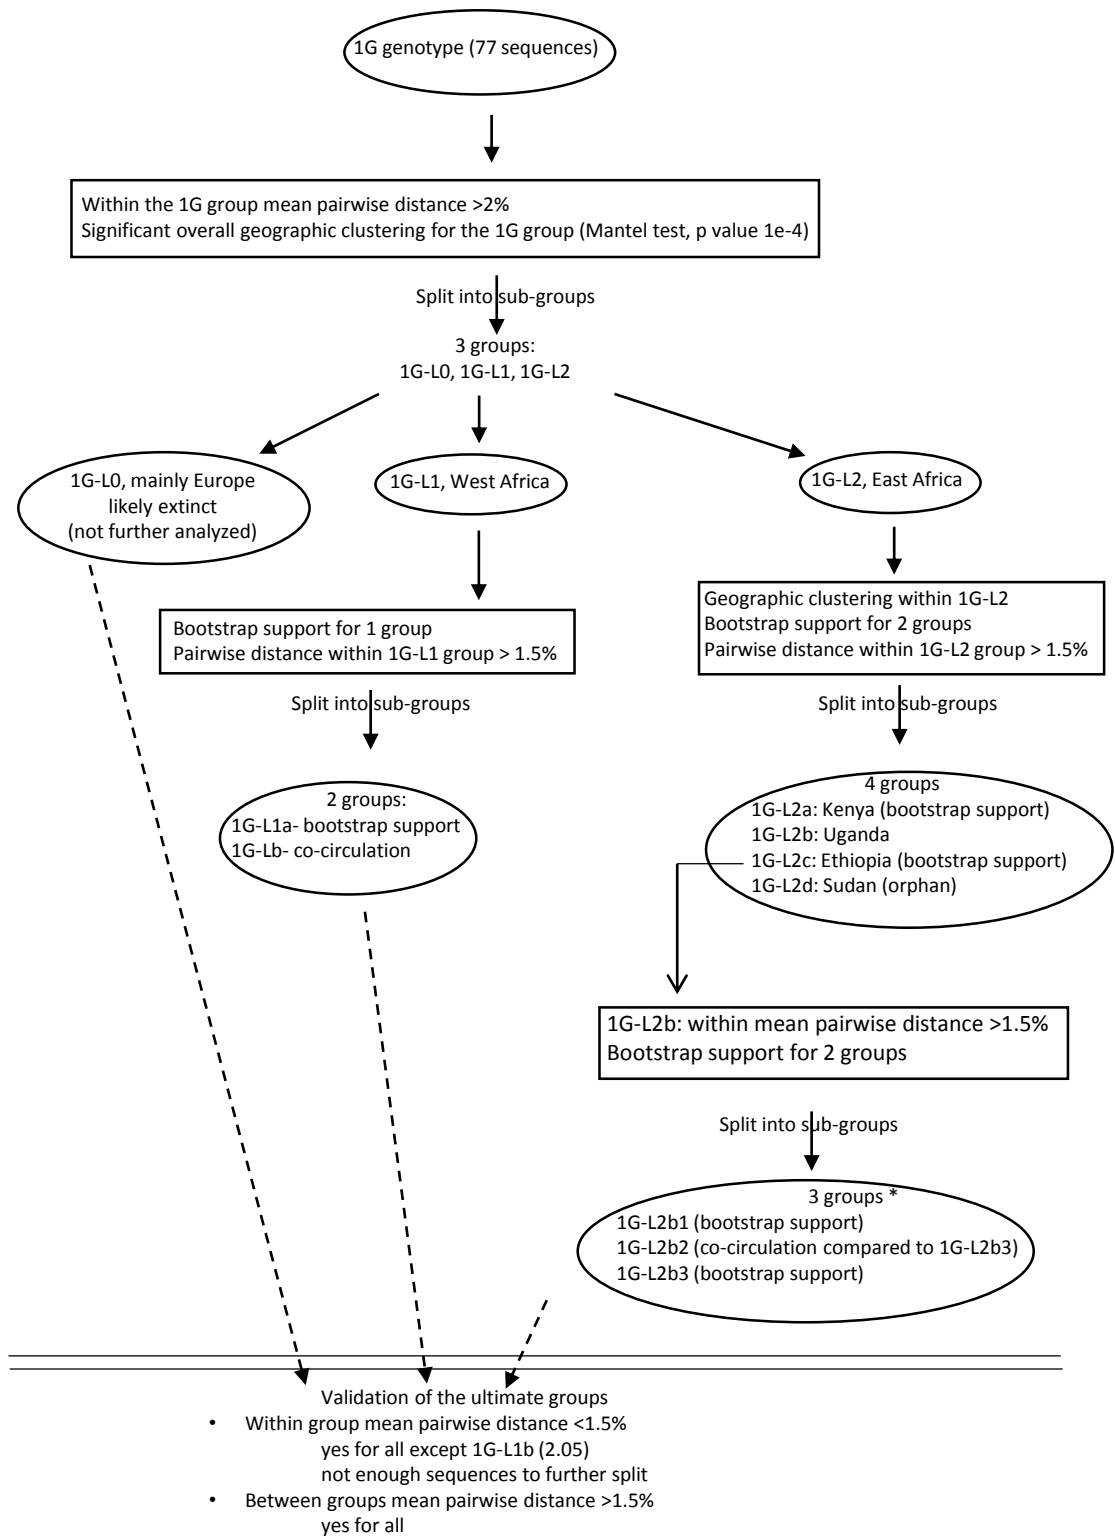

Supplementary Figure 3

# Supplementary Figure 4

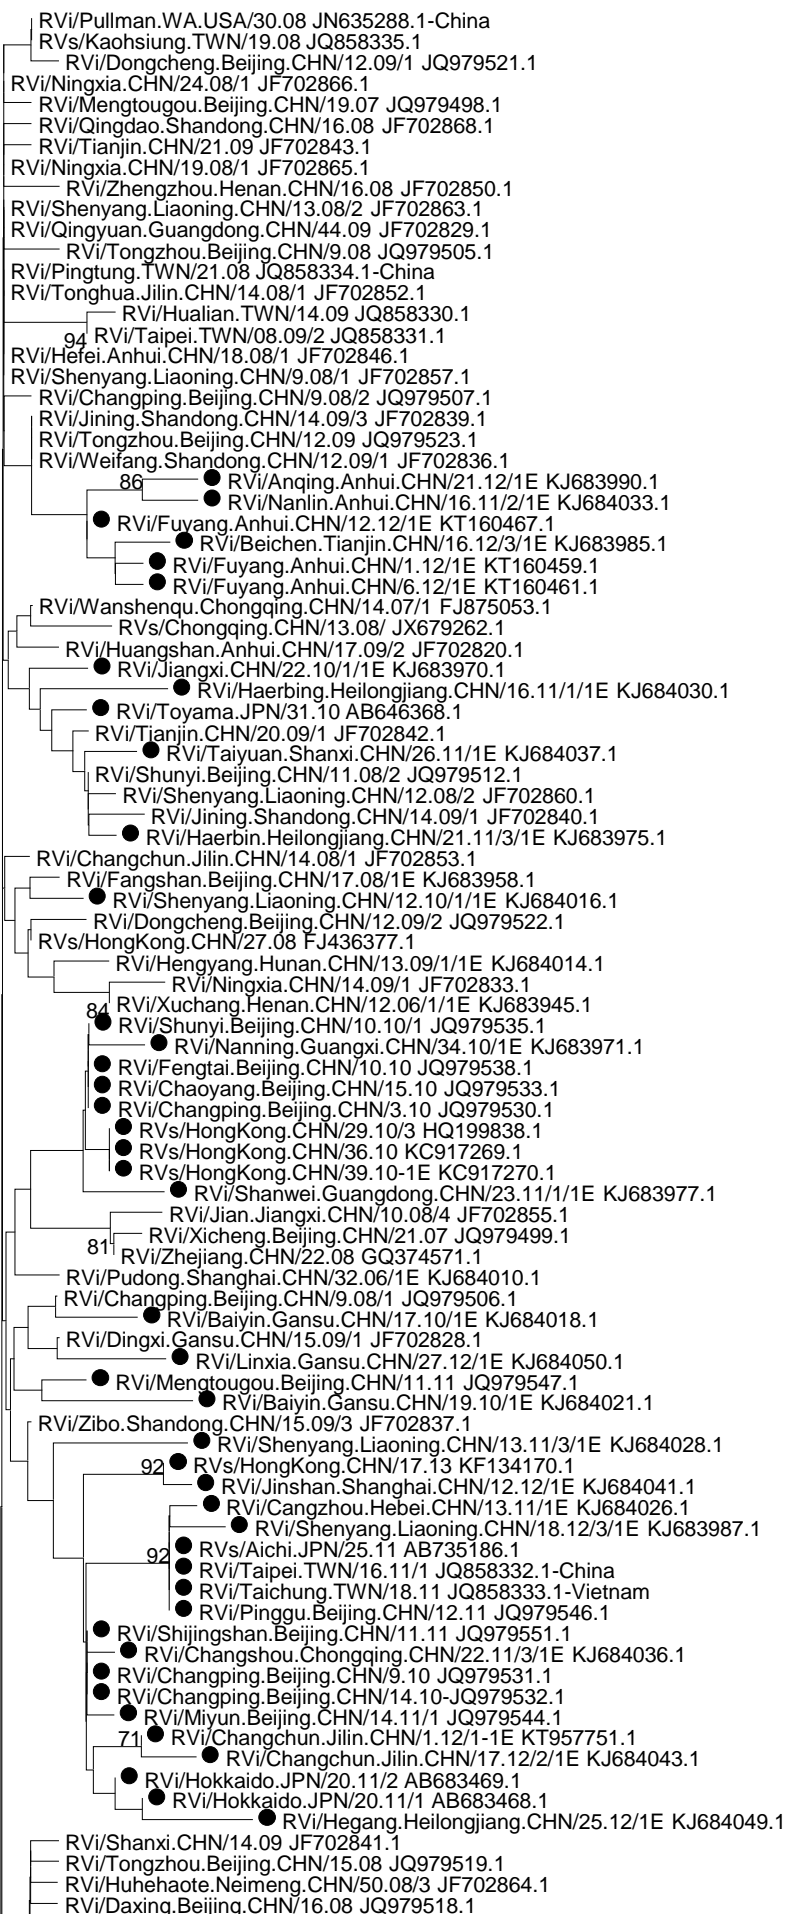

1E-L1

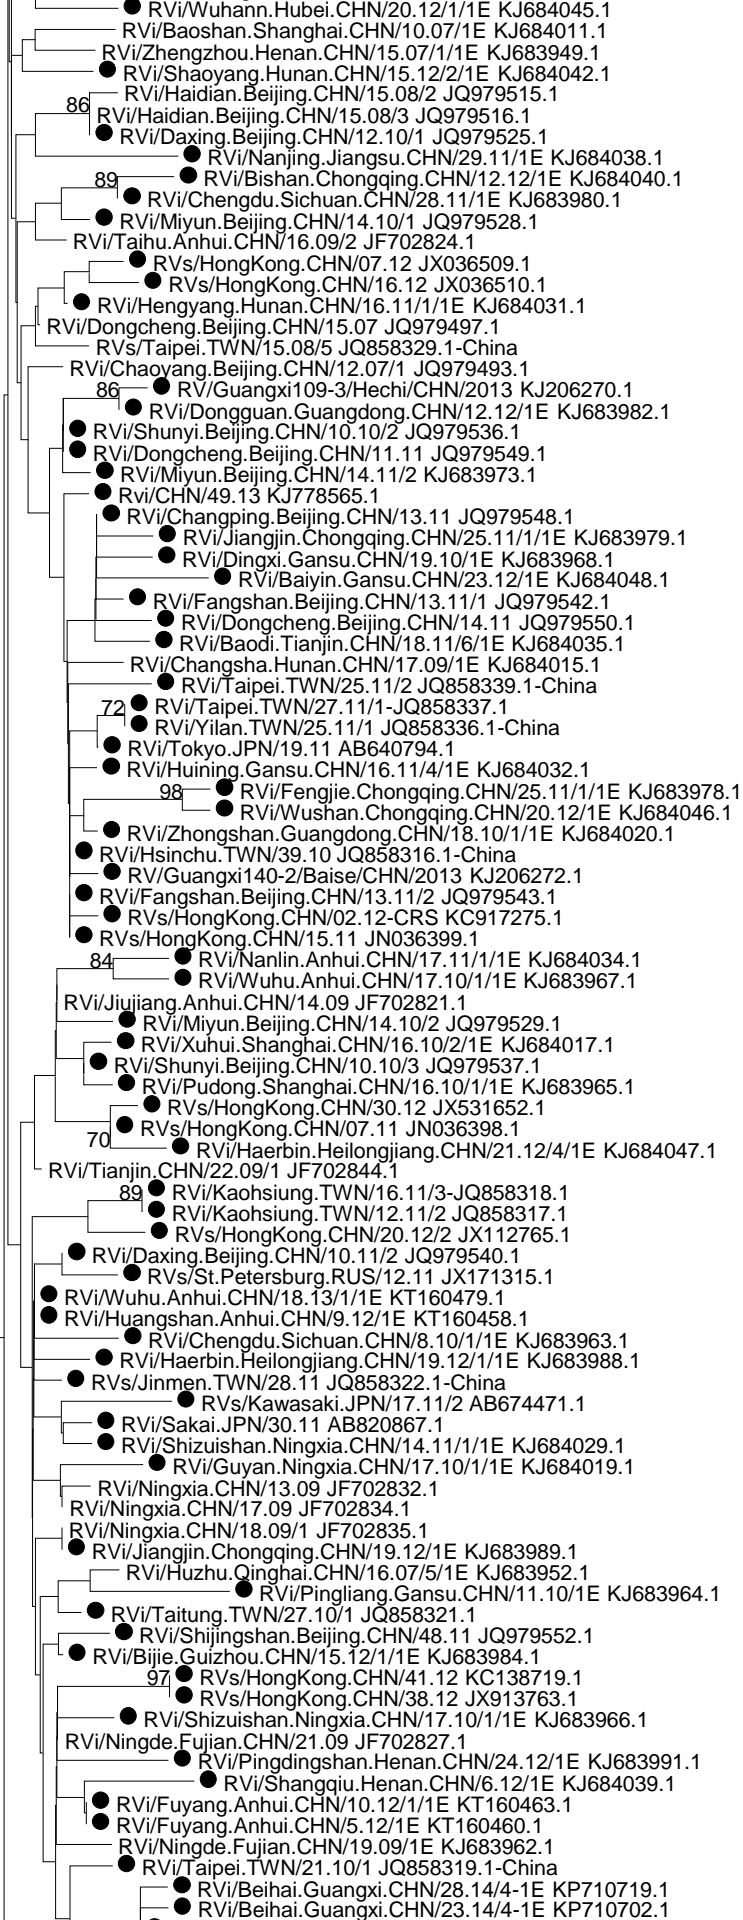

1E-L1

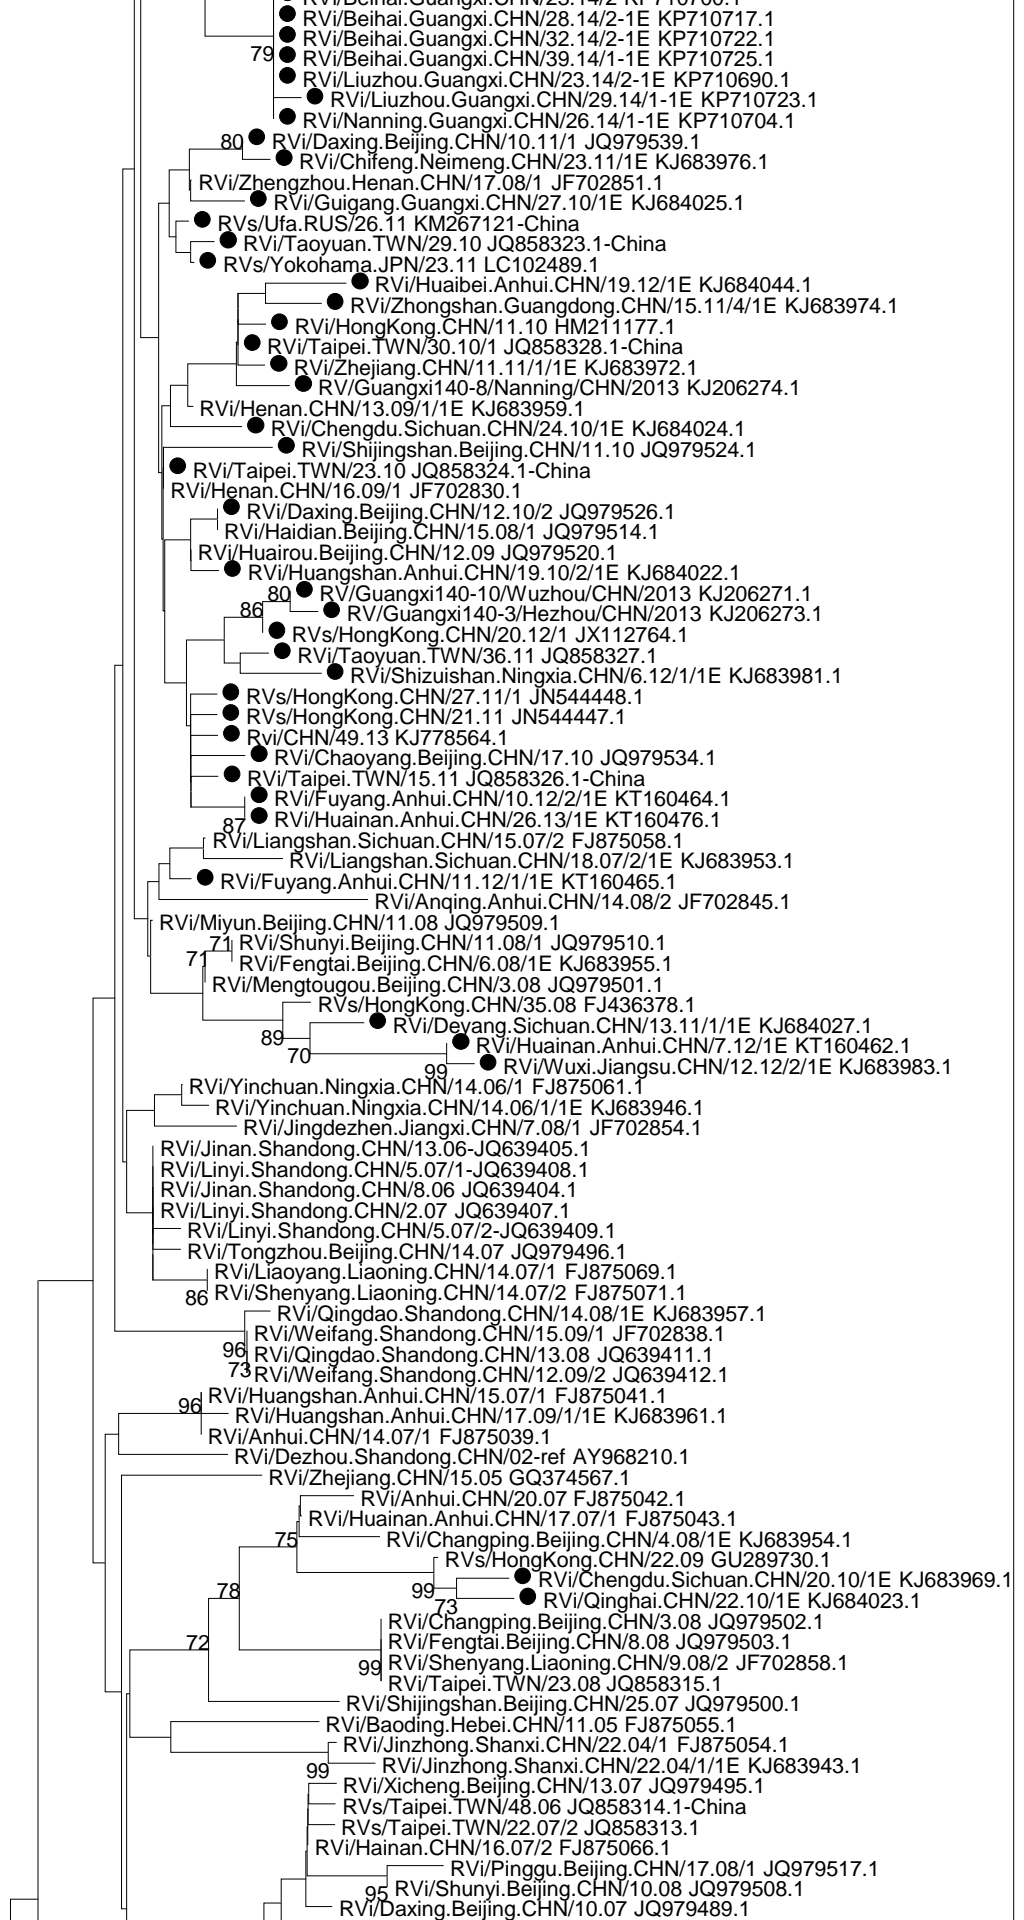

1E-L1

- RVi/Changsha.Guangxi.CHN/28.14/2-1E KP710717.1
- RVi/Beihai.Guangxi.CHN/32.14/2-1E KP710722.1
- RVi/Beihai.Guangxi.CHN/39.14/1-1E KP710725.1
- RVi/Liuzhou.Guangxi.CHN/23.14/2-1E KP710690.1
- RVi/Liuzhou.Guangxi.CHN/29.14/1-1E KP710723.1
- RVi/Nanning.Guangxi.CHN/26.14/1-1E KP710704.1
- RVi/Daxing.Beijing.CHN/10.11/1 JQ979539.1
- RVi/Chifeng.Neimeng.CHN/23.11/1E KJ683976.1
- RVi/Zhengzhou.Henan.CHN/17.08/1 JF702851.1
- RVi/Guigang.Guangxi.CHN/27.10/1E KJ684025.1
- RVs/Ufa.RUS/26.11 KM267121-China
- RVi/Taoyuan.TWN/29.10 JQ858323.1-China
- RVs/Yokohama.JPN/23.11 LC102489.1
- RVi/Huaibei.Anhui.CHN/19.12/1E KJ684044.1
- RVi/Zhongshan.Guangdong.CHN/15.11/4/1E KJ683974.1
- RVi/HongKong.CHN/11.10 HM211177.1
- RVi/Taipei.TWN/30.10/1 JQ858328.1-China
- RVi/Zhejiang.CHN/11.11/1/1E KJ683972.1
- RV/Guangxi140-8/Nanning/CHN/2013 KJ206274.1
- RVi/Henan.CHN/13.09/1/1E KJ683959.1
- RVi/Chengdu.Sichuan.CHN/24.10/1E KJ684024.1
- RVi/Shijingshan.Beijing.CHN/11.10 JQ979524.1
- RVi/Taipei.TWN/23.10 JQ858324.1-China
- RVi/Henan.CHN/16.09/1 JF702830.1
- RVi/Daxing.Beijing.CHN/12.10/2 JQ979526.1
- RVi/Haidian.Beijing.CHN/15.08/1 JQ979514.1
- RVi/Huairou.Beijing.CHN/12.09 JQ979520.1
- RVi/Huangshan.Anhui.CHN/19.10/2/1E KJ684022.1
- RV/Guangxi140-10/Wuzhou/CHN/2013 KJ206271.1
- RV/Guangxi140-3/Hezhou/CHN/2013 KJ206273.1
- RVs/HongKong.CHN/20.12/1 JX112764.1
- RVi/Taoyuan.TWN/36.11 JQ858327.1
- RVi/Shizuishan.Ningxia.CHN/6.12/1/1E KJ683981.1
- RVs/HongKong.CHN/27.11/1 JN544448.1
- RVs/HongKong.CHN/21.11 JN544447.1
- RVi/CHN/49.13 KJ778564.1
- RVi/Chaoyang.Beijing.CHN/17.10 JQ979534.1
- RVi/Taipei.TWN/15.11 JQ858326.1-China
- RVi/Fuyang.Anhui.CHN/10.12/2/1E KT160464.1
- RVi/Huainan.Anhui.CHN/26.13/1E KT160476.1
- RVi/Liangshan.Sichuan.CHN/15.07/2 FJ875058.1
- RVi/Liangshan.Sichuan.CHN/18.07/2/1E KJ683953.1
- RVi/Fuyang.Anhui.CHN/11.12/1/1E KT160465.1
- RVi/Anqing.Anhui.CHN/14.08/2 JF702845.1
- RVi/Miyun.Beijing.CHN/11.08 JQ979509.1
- RVi/Shunyi.Beijing.CHN/11.08/1 JQ979510.1
- RVi/Fengtai.Beijing.CHN/6.08/1E KJ683955.1
- RVi/Mengtougou.Beijing.CHN/3.08 JQ979501.1
- RVs/HongKong.CHN/35.08 FJ436378.1
- RVi/Devang.Sichuan.CHN/13.11/1/1E KJ684027.1
- RVi/Huainan.Anhui.CHN/7.12/1E KT160462.1
- RVi/Wuxi.Jiangsu.CHN/12.12/2/1E KJ683983.1
- RVi/Yinchuan.Ningxia.CHN/14.06/1 FJ875061.1
- RVi/Yinchuan.Ningxia.CHN/14.06/1/1E KJ683946.1
- RVi/Jingdezhen.Jiangxi.CHN/7.08/1 JF702854.1
- RVi/Jinan.Shandong.CHN/13.06-JQ639405.1
- RVi/Linyi.Shandong.CHN/5.07/1-JQ639408.1
- RVi/Jinan.Shandong.CHN/8.06 JQ639404.1
- RVi/Linyi.Shandong.CHN/2.07 JQ639407.1
- RVi/Linyi.Shandong.CHN/5.07/2-JQ639409.1
- RVi/Tongzhou.Beijing.CHN/14.07 JQ979496.1
- RVi/Liaoyang.Liaoning.CHN/14.07/1 FJ875069.1
- RVi/Shenyang.Liaoning.CHN/14.07/2 FJ875071.1
- RVi/Qingdao.Shandong.CHN/14.08/1E KJ683957.1
- RVi/Weifang.Shandong.CHN/15.09/1 JF702838.1
- RVi/Qingdao.Shandong.CHN/13.08 JQ639411.1
- RVi/Weifang.Shandong.CHN/12.09/2 JQ639412.1
- RVi/Huangshan.Anhui.CHN/15.07/1 FJ875041.1
- RVi/Huangshan.Anhui.CHN/17.09/1/1E KJ683961.1
- RVi/Anhui.CHN/14.07/1 FJ875039.1
- RVi/Dezhou.Shandong.CHN/02-ref AY968210.1
- RVi/Zhejiang.CHN/15.05 GQ374567.1
- RVi/Anhui.CHN/20.07 FJ875042.1
- RVi/Huainan.Anhui.CHN/17.07/1 FJ875043.1
- RVi/Changping.Beijing.CHN/4.08/1E KJ683954.1
- RVs/HongKong.CHN/22.09 GU289730.1
- RVi/Chengdu.Sichuan.CHN/20.10/1E KJ683969.1
- RVi/Qinghai.CHN/22.10/1E KJ684023.1
- RVi/Changping.Beijing.CHN/3.08 JQ979502.1
- RVi/Fengtai.Beijing.CHN/8.08 JQ979503.1
- RVi/Shenyang.Liaoning.CHN/9.08/2 JF702858.1
- RVi/Taipei.TWN/23.08 JQ858315.1
- RVi/Shijingshan.Beijing.CHN/25.07 JQ979500.1
- RVi/Baoding.Hebei.CHN/11.05 FJ875055.1
- RVi/Jinzhong.Shanxi.CHN/22.04/1 FJ875054.1
- RVi/Jinzhong.Shanxi.CHN/22.04/1/1E KJ683943.1
- RVi/Xicheng.Beijing.CHN/13.07 JQ979495.1
- RVs/Taipei.TWN/48.06 JQ858314.1-China
- RVs/Taipei.TWN/22.07/2 JQ858313.1
- RVi/Hainan.CHN/16.07/2 FJ875066.1
- RVi/Pinggu.Beijing.CHN/17.08/1 JQ979517.1
- RVi/Shunyi.Beijing.CHN/10.08 JQ979508.1
- RVi/Daxing.Beijing.CHN/10.07 JQ979489.1



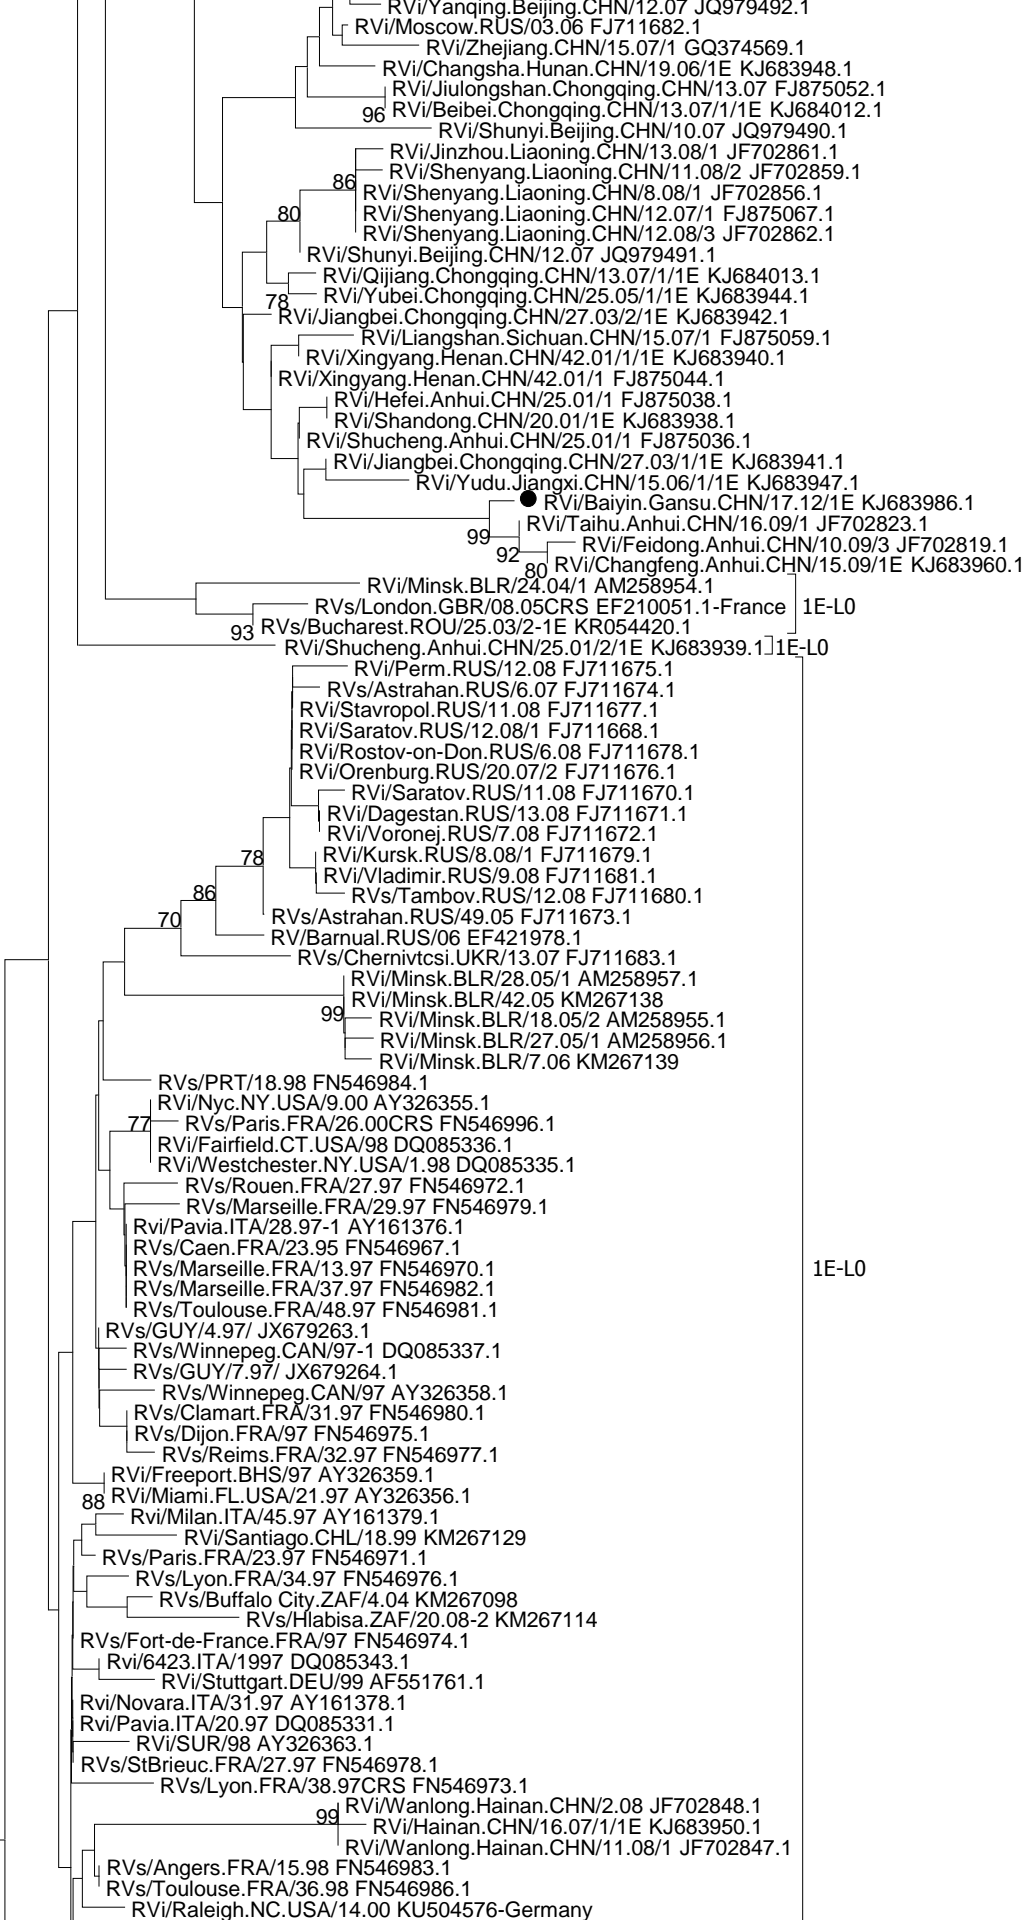

1E-L1

1E-L0

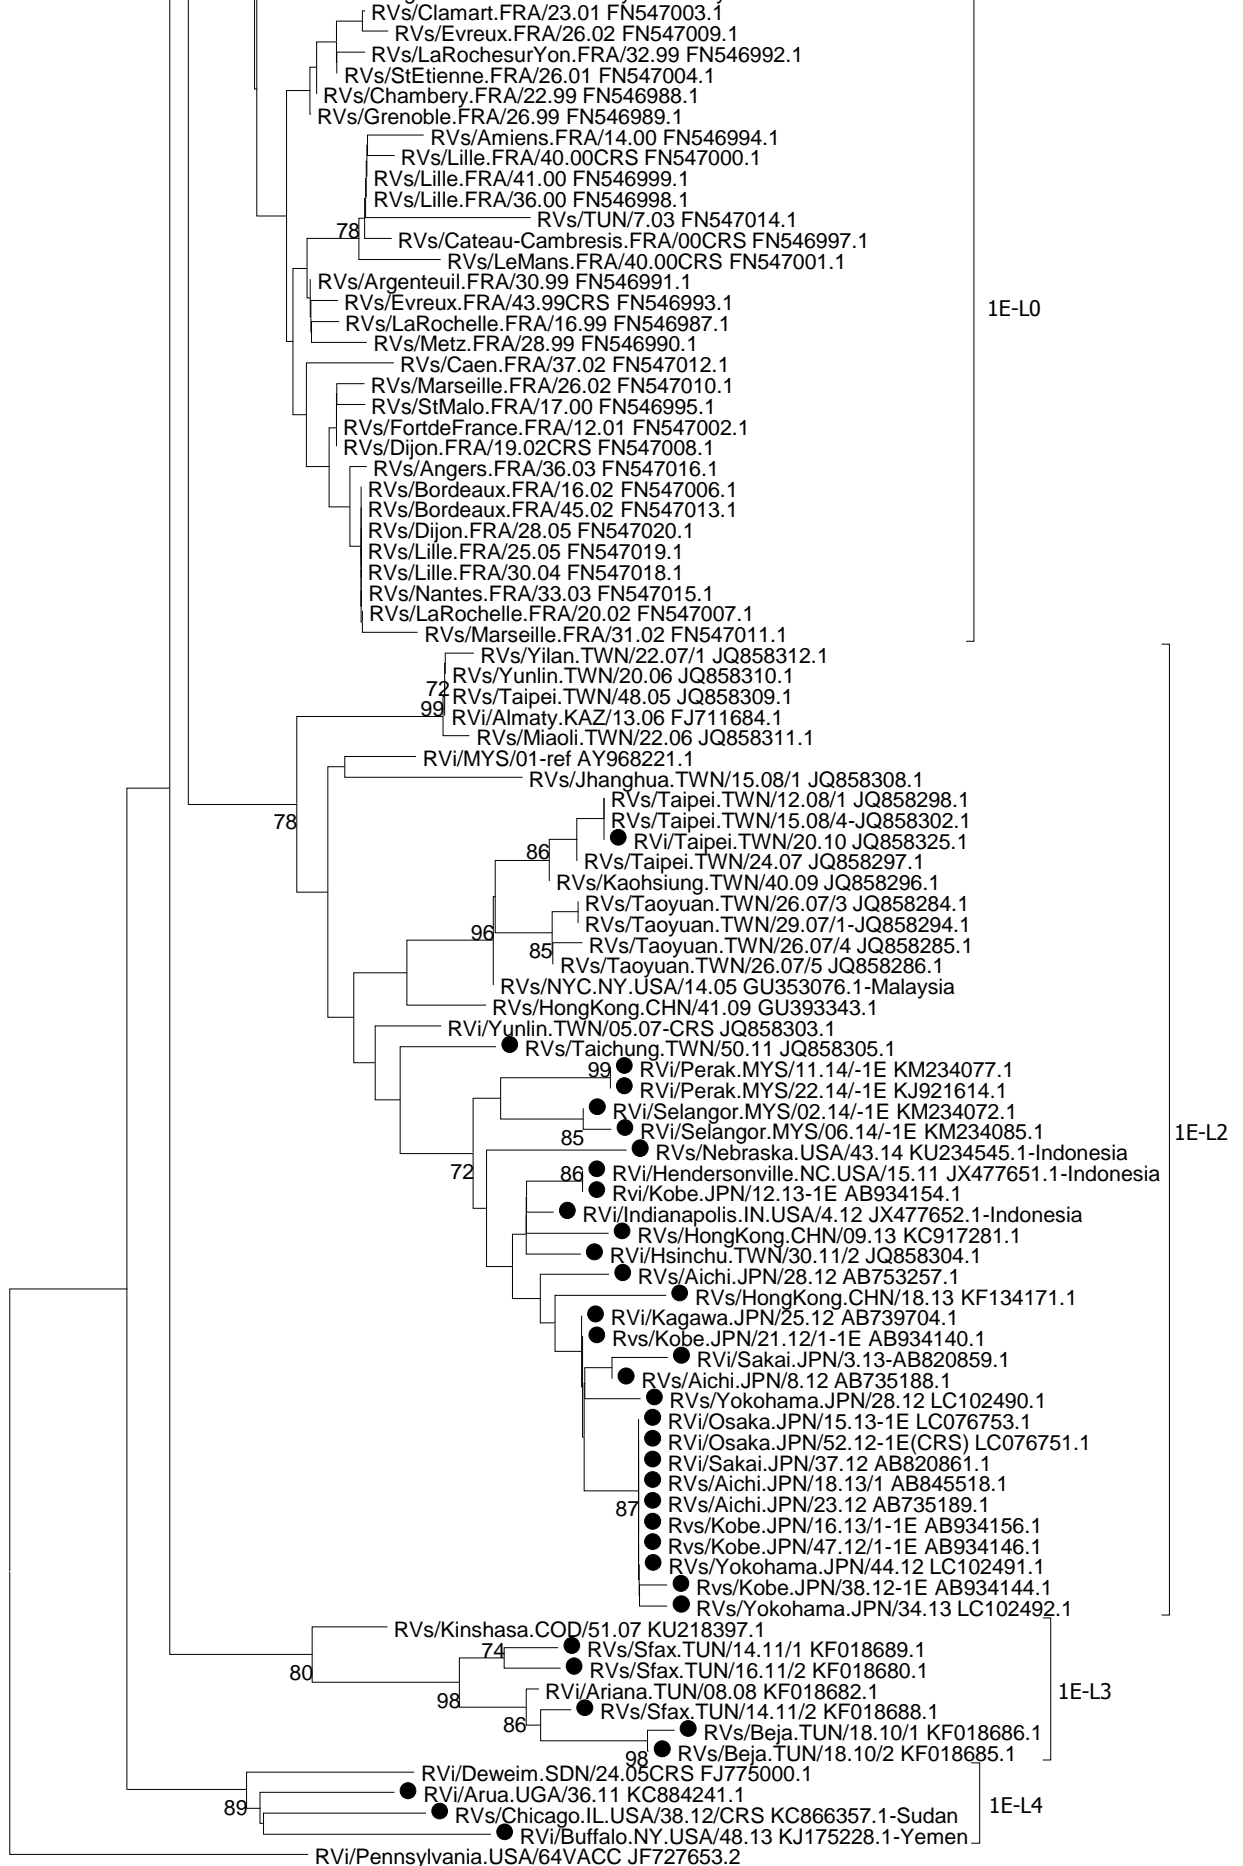

Supplementary  
Figure 5

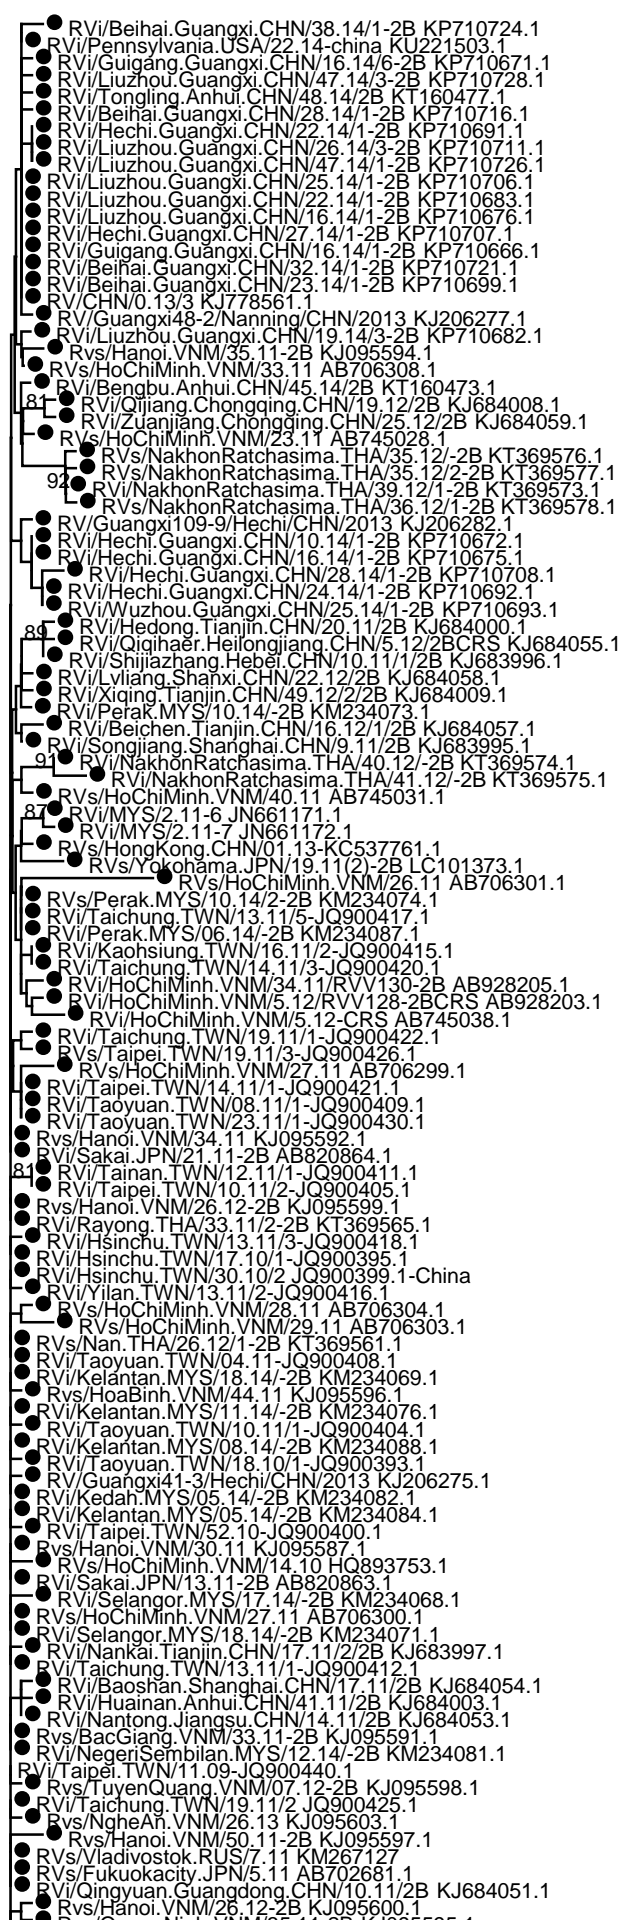

2B-L1

Rvi/Qingyuan.Guangdong.CHN/10.11/2B KJ684051.1  
Rvs/Hanoi.VNM/26.12-2B KJ095600.1  
Rvs/QuangNinh.VNM/35.11-2B KJ095595.1  
Rvs/Kaohsiung.TWN/11.10-JQ900391.1  
Rvi/Taipei.TWN/16.09.JQ900441.1  
Rvi/Kaohsiung.TWN/27.10/2-JQ900398.1-Vietnam  
Rvi/Taoyuan.TWN/13.11/4.JQ900419.1-Vietnam  
Rv/Guangxi140-1/Baise/CHN/2013.KJ206283.1  
Rvi/Taipei.TWN/17.11/2-JQ900424.1  
Rvi/Taoyuan.TWN/18.09/2-JQ900439.1  
Rvi/Taoyuan.TWN/21.11/1.JQ900428.1  
Rvs/Selangor.MYS/21.14-2B KM234078.1  
Rvi/Shanwei.Guangdong.CHN/24.11/2B KJ684002.1  
Rvi/Wuhu.Anhui.CHN/12.12/2B KT160478.1  
Rvi/Shanwei.Guangdong.CHN/19.11/1/2B KJ683999.1  
Rvi/Huainan.Anhui.CHN/15.12/2B KT160475.1  
Rv/Guangxi109-6/Hechi/CHN/2013.KJ206281.1  
Rvi/Dongguan.Guangdong.CHN/11.11/1/2B KJ684052.1  
Rvs/HoChiMinh.VNM/32.11.AB706306.1  
93 Rvs/HoChiMinh.VNM/32.11.AB706307.1  
Rvi/Taichung.TWN/10.11/3-JQ900407.1  
Rvi/Tainan.TWN/21.11/2-JQ900429.1  
Rv/Guangxi84-1/Hechi/CHN/2013.KJ206278.1  
Rvs/HungYen.VNM/22.13.KJ095602.1  
Rvs/FukuokaC.JPN/47.12-2B AB824852.1  
Rvs/HaiPhong.VNM/30.11-2B KJ095588.1  
Rvs/HoChiMinh.VNM/43.11-CRS AB745033.1  
Rv/Guangxi84-9/Hechi/CHN/2013.KJ206279.1  
Rvs/HoChiMinh.VNM/19.11.AB745027.1  
Rvs/HoChiMinh.VNM/27.11.AB706298.1  
Rvi/Sakaeo.THA/4.13-2B KT369582.1  
Rvi/Taipei.TWN/11.11/1-JQ900406.1  
Rvs/Moscow.RUS/8.11/1.KM267125  
Rvi/Taichung.TWN/09.11/2-JQ900403.1  
Rvi/HoChiMinh.VNM/31.11.AB745036.1  
Rvs/HoChiMinh.VNM/27.11.AB706302.1  
Rvs/Yokohama.JPN/5.13-2B LC101412.1  
Rvs/FukuokaC.JPN/29.12-2B AB824848.1  
Rvi/Osaka.JPN/10.13-2B LC076752.1  
Rvs/Kobe.JPN/23.13/2-2B AB934163.1  
Rvs/Kobe.JPN/50.13/1-2B AB934169.1  
Rvs/Kobe.JPN/19.13-2B AB934161.1  
Rvs/Kobe.JPN/15.13-2B AB934155.1  
Rvs/Hawaii.USA/17.13-KF792830-Japan  
Rvs/Sapporo.JPN/16.14/1-2B LC040957.1  
Rvs/Yokohama.JPN/16.14-2B LC018690.1  
Rvs/Yokohama.JPN/1.14-2B LC018686.1  
Rvs/Yokohama.JPN/5.14-2B LC018687.1  
Rvi/Osaka.JPN/15.13-2B LC076755.1  
Rvi/Kobe.JPN/23.13/1-2B AB934166.1  
Rvi/Hokkaido.JPN/26.13-2B AB889482.1  
Rvs/Kobe.JPN/29.13-2B AB934165.1  
Rvs/Sendai.JPN/20.13.AB830113.1  
Rvs/Yokohama.JPN/13.13-2B LC101424.1  
Rvs/Yokohama.JPN/25.12-2B LC101381.1  
Rvs/Yokohama.JPN/29.12-2B LC101392.1  
Rvs/Yokohama.JPN/45.12-2B LC101400.1  
Rvs/Kobe.JPN/27.13-2B AB934164.1  
Rvs/Yokohama.JPN/23.12-2B LC101380.1  
Rvs/Yokohama.JPN/26.12(2)-2B LC101384.1  
Rvs/Yokohama.JPN/26.12(4)-2B LC101386.1  
Rvs/FukuokaC.JPN/38.12-2B AB824850.1  
Rvs/FukuokaC.JPN/43.12-2B AB824851.1  
Rvs/Yokohama.JPN/4.13(4)-2B LC101411.1  
Rvs/Yokohama.JPN/20.13-2B LC018682.1  
Rvs/Yokohama.JPN/5.13(2)-2B LC101413.1  
Rvs/Yokohama.JPN/4.13(2)-2B LC101409.1  
Rvs/Yokohama.JPN/31.12-2B LC101394.2B-L1  
Rvs/Yokohama.JPN/2.13-2B LC101405.1  
Rvs/Yokohama.JPN/11.13-2B LC101421.1  
Rvs/Yokohama.JPN/24.13-2B LC018684.1  
Rvs/Aichi.JPN/40.13-2B AB897699.1  
Rvs/Yokohama.JPN/42.13-2B LC018685.1  
Rvi/KhonKaen.THA/27.12/1-2B KT369571.1  
Rvi/Kobe.JPN/5.13-2B AB934153.1  
Rvi/Osaka.JPN/14.13-2B LC063348  
Rvi/Sakai.JPN/28.12/3-2B AB820860.1  
Rvi/Shimane.JPN/15.13-2B LC002207.1  
Rvi/Shimane.JPN/19.13-2B LC002208.1  
Rvs/Aichi.JPN/1.13.AB845510.1  
Rvs/Aichi.JPN/18.13/2-2B AB845519.1  
Rvs/Aichi.JPN/30.12.AB753258.1  
Rvs/Aichi.JPN/32.13-2B AB897696.1  
Rvs/Aichi.JPN/42.13/1-2B AB897700.1  
Rvs/Aichi.JPN/52.13.LC020236.1  
Rvs/Aichi.JPN/9.13/1-2B AB845513.1  
Rvs/Aichi.JPN/9.14.LC020237.1  
Rvs/FukuokaC.JPN/2.13-2B AB824853.1  
Rvs/FukuokaC.JPN/3.13-2B AB824854.1  
Rvs/FukuokaC.JPN/31.12-2B AB824849.1  
Rvs/Kobe.JPN/21.13/2-2B AB934162.1  
Rvs/Ontario.CAN/14.13-KF035054.1-Japan  
Rvs/Saitama.JPN/28.13/(CRS)NCCHD-2B AB920562.1  
Rvs/Yokohama.JPN/15.13-2B LC018677.1  
Rvs/Yokohama.JPN/21.13-2B LC018683.1  
Rvs/Yokohama.JPN/25.12(2)-2B LC101382.1  
Rvs/Yokohama.JPN/25.13-2B LC101427.1  
Rvs/Yokohama.JPN/29.12(2)-2B LC101393.1  
Rvi/Hokkaido.JPN/16.13/2-2B AB889477.1  
Rvs/Hokkaido.JPN/18.13-2B AB889479.1  
Rvi/Hokkaido.JPN/17.13-2B AB889478.1  
Rvs/Yokohama.JPN/32.12-2B LC101395.1  
Rvs/Yokohama.JPN/35.12-2B LC101398.1  
Rvs/Yokohama.JPN/10.13-2B LC101420.1  
Rvs/Yokohama.JPN/42.12-2B LC101399.1  
Rvi/Hokkaido.JPN/10.13-2B AB889474.1  
Rvs/Hokkaido.JPN/13.13/2-2B AB889476.1  
Rvi/Hokkaido.JPN/43.12-2B AB889473.1  
Rvs/Yokohama.JPN/50.12-2B LC101402.1  
Rvs/HongKong.CHN/21.13-KF305760.1  
88 Rvs/Aichi.JPN/37.13-2B AB897698.1  
Rvs/Aichi.JPN/43.13-2B AB897702.1  
Rvs/Aichi.JPN/27.13.AB845521.1

2B-L1

RVs/Aichi.JPN/27.13 AB845521.1  
● RVs/Yokohama.JPN/6.13-2B LC101417.1  
● RVs/Yokohama.JPN/9.13-2B LC101419.1  
● RVi/Hokkaido.JPN/22.13/1-2B AB889481.1  
● RVs/Yokohama.JPN/26.12(6)-2B LC101388.1  
● RVi/KhonKaen.THA/27.12/3-2B KT369572.1  
● RVs/Aichi.JPN/20.13 AB845520.1  
● RVi/SuphanBuri.THA/24.12/2-2B KT369581.1  
RVs/HongKong.CHN/49.08 FJ656218.1  
● RVs/HoChiMinh.VNM/44.10 HQ893756.1  
● RVs/HongKong.CHN/16.11-KC917271.1  
● RVs/HoChiMinh.VNM/23.11 AB745030.1  
● RVs/Prahova.ROU/18.12/2B KR021377.1  
● RVs/BistritaNasaud.ROU/45.11/2B KR021374.1  
● RVs/Colchester.GBR/18.12-JX398308.1  
● RVs/Ialomita.ROU/12.12/2B KR021375.1  
● RVs/Vaslui.ROU/05.12/2B KR021378.1  
● RVs/BistritaNasaud.ROU/05.12/2B KP903738.1  
● RVs/Bacau.ROU/07.12/2B KP941058.1  
● RVs/Isle-of-Man.GBR/3.12 JX398302.1-Romania  
● RVi/HoChiMinh.VNM/41.11-CRS AB745037.1  
● RVs/BistritaNasaud.ROU/06.12/2B KP903737.1  
● RVs/Bacau.ROU/06.12/2B KP941062.1  
● RVs/Aichi.JPN/4.12 AB735187.1  
● RVi/DEU/45.11 KF537570.1  
● RVs/Alba.ROU/43.11/2B KR054424.1  
● RVs/Valcea.ROU/05.12/2B KP941059.1  
● RVi/Bangkok.THA/22.12/2-2B KT369569.1  
● RVi/Guangxi140-7/Nanning/CHN/2013 KJ206285.1  
● RVs/Kumamoto.JPN/11.11 AB632389.1  
● RVs/Prahova.ROU/05.12/2-2B KP941061.1  
● RVs/Hanoi.VNM/35.11-2B KJ095593.1  
● RVi/HoChiMinh.VNM/19.11 AB745039.1  
88 ● RVi/HoChiMinh.VNM/20.12/RVV129-2B AB928204.1  
● RVi/HongKong.CHN/27.11/2 JN827384.1  
● RVi/Taichung.TWN/14.11/2-JQ900413.1  
● RVi/Haerbin.Heilongjiang.CHN/18.12/2B KJ684007.1  
● RVs/HoChiMinh.VNM/41.10 HQ893754.1  
● RVi/ShaoYang.Hunan.CHN/23.11/2/2B KJ684001.1  
● RVs/Yokohama.JPN/14.12-2B LC101379.1  
● RVi/Guangxi41-6/Hechi/CHN/2013 KJ206276.1  
● RVi/Zhanjiang.Guangdong.CHN/9.12/3/2B KJ684056.1  
● RVs/HongKong.CHN/19.14-2B KJ940971.1  
83 ● RVi/Nanning.Guangxi.CHN/25.14/1-2B KP710697.1  
89 ● RVi/Wuzhou.Guangxi.CHN/24.14/1-2B KP710694.1  
● RVi/Liuzhou.Guangxi.CHN/24.14/1-2B KP710705.1  
● RVi/Nanning.Guangxi.CHN/25.14/2-2B KP710698.1  
● RVi/HongKong.CHN/43.11 JQ031213.1-Indonesia  
● RVs/HongKong.CHN/01.12-JX036507.1  
● RVs/HongKong.CHN/04.12-2B KC917276.1  
● RVs/HongKong.CHN/31.14-2B KM878664.1  
● RVi/Nanjing.Jiangsu.CHN/15.12/2B KJ684005.1  
● RVi/Hefei.Anhui.CHN/26.14/1/2B KT160474.1  
72 ● RVi/Wuzhou.Guangxi.CHN/29.14/1-2B KP710715.1  
● RVi/Guangxi140-5/Nanning/CHN/2013 KJ206284.1  
● RVi/Chongming.Shanghai.CHN/17.12/2B KJ684006.1  
● RVi/Guangxi96-1/Qinzhou/CHN/2013 KJ206280.1  
● RVi/Haerbin.Heilongjiang.CHN/18.11/2B KJ683998.1  
● RVi/Tainan.TWN/30.11/1-JQ900431.1  
● RVs/HongKong.CHN/06.12/1 JX036508.1  
● RVs/HongKong.CHN/18.11-KC917272.1  
● RVi/Taoyuan.TWN/12.11/3-JQ900414.1  
● RVs/Yokohama.JPN/40.10-2B LC101368.1  
● RVs/Moscow.RUS/26.11 KM267123  
● RVs/Taipei.TWN/11.11/2-JQ900410.1  
● RVi/Manitoba.CAN/13.11/1 JF911797.2-Philippines  
RVs/Taipei.TWN/07.08-JQ900381.1  
● RVs/Taoyuan.TWN/21.09-JQ900443.1  
● RVi/Phetchaburi.THA/15.10/1-2B KT369562.1  
RVi/Taoyuan.TWN/23.09-JQ900438.1  
● RVi/SamutPrakan.THA/6.11/4-2B KT369568.1  
● RVi/Taipei.TWN/17.10/2-JQ900396.1  
● RVi/Taoyuan.TWN/15.10-JQ900392.1  
● RVs/Moscow.RUS/8.11/2 KM267124  
● RVi/Tainan.TWN/09.11/1-JQ900402.1  
● RVi/Sakai.JPN/28.11-2B AB820866.1  
86 ● RVs/Osaka.JPN/8.11 AB665169.1  
71 ● RVi/MYS/2.11-2 JN661164.1  
84 ● RVi/MYS/3.11-1 JN661168.1  
● RVi/MYS/2.11-3 JN661165.1  
● RVi/MYS/2.11-1 JN661163.1  
● RVi/Esfahan.IRN/1090.11-2B KP100419.1  
● RVi/Chachoengsao.THA/51.12/2B KT369570.1  
● RVi/Bangkok.THA/2.11/3-2B KT369563.1  
● RVi/ChonBuri.THA/37.11/5-2B KT634052.1  
● RVs/HungYen.VNM/32.11 KJ095590.1  
● RVs/Yokohama.JPN/12.11-2B LC101370.1  
● RVs/Yokohama.JPN/22.11-2B LC101376.1  
● RVi/Taipei.TWN/23.11/2-JQ900427.1  
● RVs/HoChiMinh.VNM/12.10 HQ893751.1  
● RVs/Yokohama.JPN/21.11-2B LC101375.1  
● RVs/Yokohama.JPN/27.11-2B LC101378.1  
● RVs/HoChiMinh.VNM/43.11-CRS AB745034.1  
● RVs/FukuokaC.JPN/27.11-2B AB824845.1  
● RVs/FukuokaC.JPN/34.11-2B AB824846.1  
74 ● RVs/Fukuokacity.JPN/53.11 AB702684.1  
● RVs/HoChiMinh.VNM/26.11 AB706305.1  
● RVs/Kobe.JPN/28.12/2-2B AB934137.1  
● RVs/Phetchaburi.THA/8.12/1-2B KT369580.1  
● RVs/Kobe.JPN/47.12/2-2BCRS AB934147.1  
● RVs/Kobe.JPN/42.12/1-2BCRS AB934145.1  
● RVs/Kobe.JPN/31.12-2B AB934139.1  
● RVs/Kobe.JPN/24.12-2B AB934135.1  
● RVs/Kobe.JPN/16.12 AB934134.1  
● RVs/Kobe.JPN/13.12-2B AB934131.1  
● RVs/FukuokaC.JPN/24.12-2B AB824847.1  
● RVi/Kobe.JPN/27.12-2B AB934142.1  
● RVi/Kobe.JPN/21.12/2-2B AB934141.1  
● RVs/Kobe.JPN/15.12-2B AB934130.1  
● RVi/Kobe.JPN/22.13/2-2B AB934168.1  
● RVs/Kobe.JPN/8.13.2B AB934163.1

2B-L1

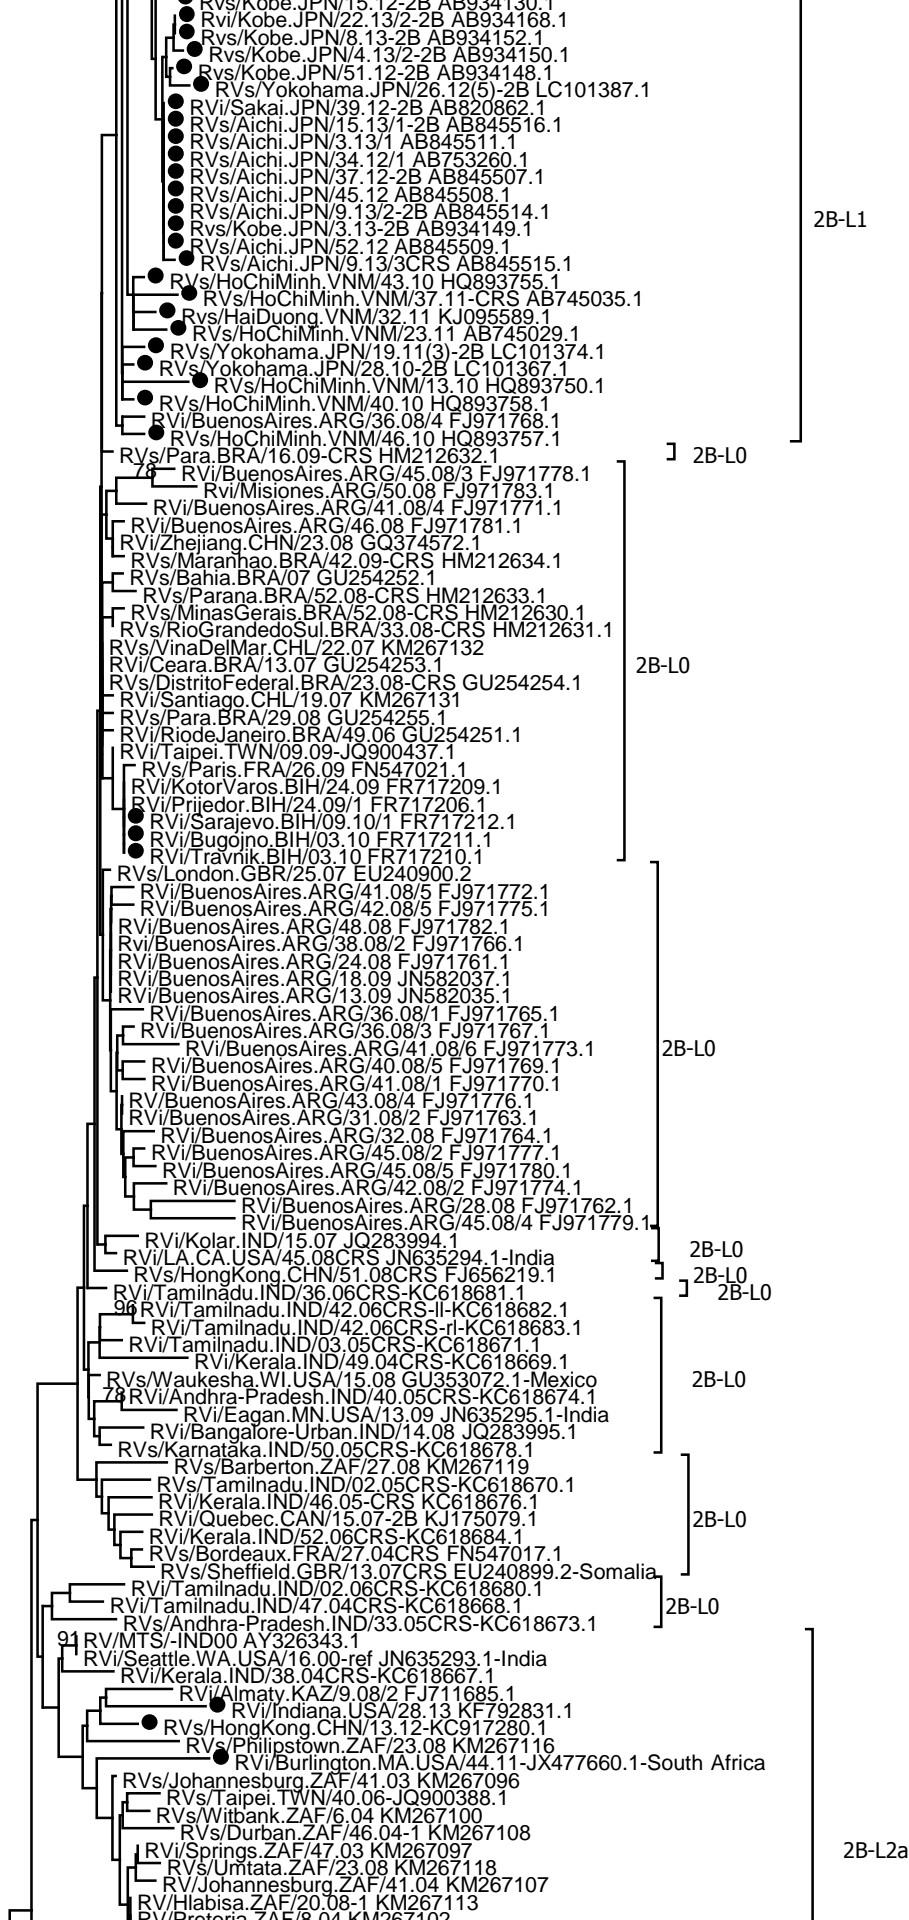

2B-L1

2B-L0

2B-L0

2B-L0

2B-L0

2B-L0

2B-L0

2B-L0

2B-L0

2B-L2a

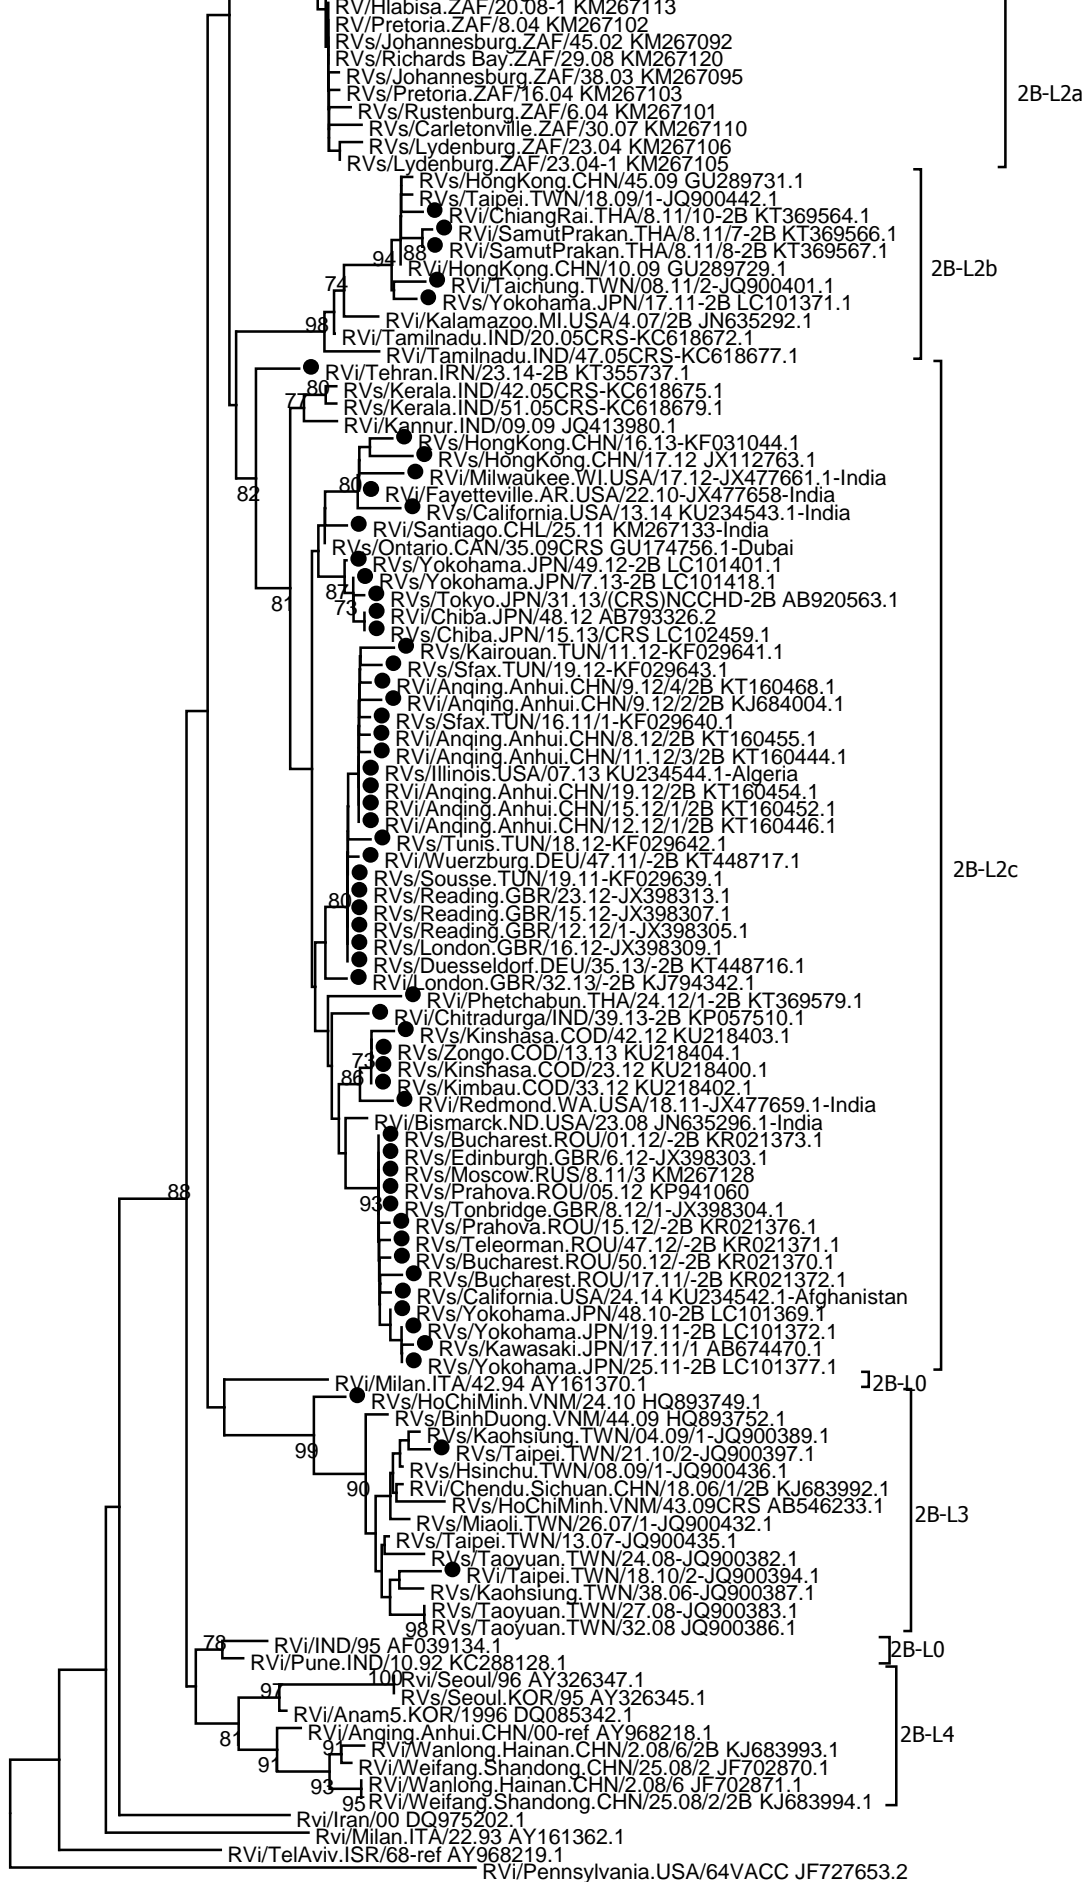

0.01
